# Supplementary material for: Lactoferrin Prevents Hepatic Injury and Fibrosis via the Inhibition of NF-κB Signaling in a Rat Non-Alcoholic Steatohepatitis Model
Source: MDPI journal article supplement (doi:10.3390/nu14010042), 2021-12-23
Supplement: s1 [file s1]

Table S1. Histopathology of NASH, fibrosis and hepatocarcinogenesis in connexin 32 dominant negative transgenic rats fed a high fat diet and dimethylnitrosamine with or without lactoferrin (100 or 500 mg/kg/day) at week 17.

|         | Score           |                      |                   |                   |                   | Azan (%)          | $\alpha$ -SMA (%) | GST-P Number (/cm <sup>2</sup> ) | GST-P Area (mm <sup>2</sup> /cm <sup>2</sup> ) |
|---------|-----------------|----------------------|-------------------|-------------------|-------------------|-------------------|-------------------|----------------------------------|------------------------------------------------|
|         | Steatosis       | Lobular inflammation | Ballooning        | NAS               | Fibrosis          |                   |                   |                                  |                                                |
| Control | 3.0 $\pm$ 0.0   | 2.3 $\pm$ 0.4        | 1.9 $\pm$ 0.3     | 7.1 $\pm$ 0.5     | 3.3 $\pm$ 0.5     | 12.9 $\pm$ 8.4    | 6.3 $\pm$ 4.4     | 20.9 $\pm$ 11.9                  | 0.51 $\pm$ 0.54                                |
| LF100   | 2.8 $\pm$ 0.4   | 1.4 $\pm$ 0.5****    | 1.3 $\pm$ 0.4***  | 5.4 $\pm$ 0.9**** | 2.6 $\pm$ 0.5***  | 8.1 $\pm$ 4.0**** | 3.4 $\pm$ 3.3**** | 17.4 $\pm$ 9.6                   | 0.36 $\pm$ 0.60                                |
| LF500   | 2.4 $\pm$ 0.6** | 1.2 $\pm$ 0.4****    | 1.1 $\pm$ 0.3**** | 4.8 $\pm$ 0.8**** | 2.4 $\pm$ 0.5**** | 7.2 $\pm$ 5.0**** | 2.1 $\pm$ 1.5**** | 16.8 $\pm$ 5.7                   | 0.32 $\pm$ 0.32                                |

$\alpha$ -SMA,  $\alpha$ -smooth muscle actin; GST-P, glutathione S-transferase placental form; LF100, lactoferrin 100 mg/kg/day; LF500, lactoferrin 500 mg/kg/day; NAS, non-alcoholic fatty liver disease activity score; NASH, non-alcoholic steatohepatitis

Dunnett's test \*: P<0.05, \*\*: P<0.01, \*\*\*: P<0.001, \*\*\*\*: P<0.0001 vs. Control

Table S2. mRNA level of inflammatory cytokines using quantitative reverse transcription PCR.

|         | <i>Tnf-α</i> | <i>Il-6</i>  | <i>Il-18</i> | <i>Ifn-γ</i> | <i>Il-1β</i> | <i>Tgf-β1</i> | <i>Timp1</i> | <i>Timp2</i>  | <i>Col1a1</i> | <i>Ctgf</i> |
|---------|--------------|--------------|--------------|--------------|--------------|---------------|--------------|---------------|---------------|-------------|
| Control | 1.8 ± 0.7    | 10.0 ± 5.7   | 4.6 ± 3.0    | 1.8 ± 0.9    | 2.3 ± 0.9    | 8.5 ± 2.5     | 2.0 ± 1.3    | 6.1 ± 2.8     | 2.7 ± 2.6     | 1.2 ± 1.1   |
| LF100   | 0.9 ± 0.5*** | 4.6 ± 4.1**  | 3.2 ± 1.6    | 1.4 ± 0.7    | 1.6 ± 0.5**  | 5.0 ± 1.4**** | 1.1 ± 0.5*   | 2.3 ± 0.7**** | 0.7 ± 0.4**   | 1.0 ± 1.0   |
| LF500   | 1.0 ± 0.4*** | 3.9 ± 2.0*** | 2.5 ± 1.3*   | 1.6 ± 1.5    | 1.5 ± 0.5*** | 5.2 ± 1.5**** | 1.3 ± 0.6    | 2.9 ± 1.4**** | 1.0 ± 1.0*    | 1.0 ± 1.0   |

Col1a1, collagen1a1; Ctgf, connective tissue growth factor; Ifn-γ, interferon-γ; Il-1β, interleukin-1β; Il-6, interleukin-6; Il-18, interleukin-18; LF100, lactoferrin 100 mg/kg/day; LF500, lactoferrin 500 mg/kg/day; Tgf-β1, transforming growth factor-β; Timp1, tissue inhibitor of metalloproteinase-1; Timp2, tissue inhibitor of metalloproteinase-2; Tnf-α, tumor necrosis factor-α

Dunnett's test \*: P<0.05, \*\*: P<0.01, \*\*\*: P<0.001, \*\*\*\*: P<0.0001 vs. Control
